# Supplementary material for: A Role of Sp1 Binding Motifs in Basal and Large T-Antigen-Induced Promoter Activities of Human Polyomavirus HPyV9 and Its Variant UF-1
Source: PubMed Central journal article supplement (PMC5713382; doi:10.3390/ijms18112414), 2017-11-14
Supplement: ijms-18-02414-s001.pdf [file ijms-18-02414-s001.pdf]

Results transfection in seven human cell lines

Results transfections in seven human cell lines

Case Summaries

| SKWe/l = SK cell+Wild type/H9+early/late promoter,<br>SKVe = SK cell+Variant/UF1+early, HWe = HEK<br>cell+Wild type/H9+early, HVe = HEK<br>cell+Variant/UF1+early, BELWe=BEL cell+Wild<br>type/H9+early |                | ratio=luc/protein<br>concentration | RelativeRatio=r<br>atio/meanRatio<br>x 100% | RelativeRatio2<br>=ratio/meanRatio2<br>x 100% |
|---------------------------------------------------------------------------------------------------------------------------------------------------------------------------------------------------------|----------------|------------------------------------|---------------------------------------------|-----------------------------------------------|
| BELHe                                                                                                                                                                                                   | N              | 12                                 | 12                                          | 12                                            |
|                                                                                                                                                                                                         | Mean           | 11,3213                            | 99,9827                                     | 99,9827                                       |
|                                                                                                                                                                                                         | Median         | 8,6175                             | 101,9896                                    | 101,9896                                      |
|                                                                                                                                                                                                         | Std. Deviation | 8,39754                            | 18,68030                                    | 18,68030                                      |
|                                                                                                                                                                                                         | Minimum        | 1,70                               | 63,45                                       | 63,45                                         |
|                                                                                                                                                                                                         | Maximum        | 26,93                              | 131,26                                      | 131,26                                        |
| BELHI                                                                                                                                                                                                   | N              | 12                                 | 12                                          | 12                                            |
|                                                                                                                                                                                                         | Mean           | 22,6754                            | 100,0335                                    | 246,4719                                      |
|                                                                                                                                                                                                         | Median         | 14,2473                            | 99,1740                                     | 215,8608                                      |
|                                                                                                                                                                                                         | Std. Deviation | 21,18865                           | 11,30509                                    | 183,89991                                     |
|                                                                                                                                                                                                         | Minimum        | 4,14                               | 85,96                                       | 51,06                                         |
|                                                                                                                                                                                                         | Maximum        | 62,07                              | 116,52                                      | 532,31                                        |
| BELUe                                                                                                                                                                                                   | N              | 12                                 | 12                                          | 12                                            |
|                                                                                                                                                                                                         | Mean           | 51,8208                            | 626,2552                                    | 626,2552                                      |
|                                                                                                                                                                                                         | Median         | 32,5267                            | 529,0969                                    | 529,0969                                      |
|                                                                                                                                                                                                         | Std. Deviation | 44,52618                           | 421,88797                                   | 421,88797                                     |
|                                                                                                                                                                                                         | Minimum        | 17,75                              | 155,56                                      | 155,56                                        |
|                                                                                                                                                                                                         | Maximum        | 153,98                             | 1320,58                                     | 1320,58                                       |
| BELUI                                                                                                                                                                                                   | N              | 12                                 | 12                                          | 12                                            |
|                                                                                                                                                                                                         | Mean           | 48,7794                            | 321,8155                                    | 774,7567                                      |
|                                                                                                                                                                                                         | Median         | 37,9151                            | 292,5261                                    | 519,2039                                      |
|                                                                                                                                                                                                         | Std. Deviation | 31,17919                           | 165,12058                                   | 707,19811                                     |

|        |                |              |           |           |
|--------|----------------|--------------|-----------|-----------|
|        | Minimum        | 18,32        | 153,21    | 153,21    |
|        | Maximum        | 105,19       | 560,77    | 1997,88   |
| C33AHe | N              | 9            | 9         | 9         |
|        | Mean           | 964772,3469  | 100,0000  | 100,0000  |
|        | Median         | 689457,5893  | 103,1342  | 103,1342  |
|        | Std. Deviation | 459878,81416 | 9,65341   | 9,65341   |
|        | Minimum        | 574882,35    | 85,88     | 85,88     |
|        | Maximum        | 1730706,47   | 111,82    | 111,82    |
| C33AHI | N              | 9            | 9         | 9         |
|        | Mean           | 3070632,4128 | 100,0000  | 346,0499  |
|        | Median         | 2741740,5248 | 99,5685   | 389,3253  |
|        | Std. Deviation | 817752,64344 | 12,17783  | 77,35476  |
|        | Minimum        | 2114814,81   | 83,77     | 221,96    |
|        | Maximum        | 4898584,91   | 122,79    | 422,66    |
| C33AUe | N              | 9            | 9         | 9         |
|        | Mean           | 2839185,3606 | 335,7420  | 335,7420  |
|        | Median         | 3243407,7079 | 288,7011  | 288,7011  |
|        | Std. Deviation | 822765,84585 | 154,09556 | 154,09556 |
|        | Minimum        | 1533044,44   | 171,07    | 171,07    |
|        | Maximum        | 3826086,96   | 588,50    | 588,50    |
| C33AUI | N              | 9            | 9         | 9         |
|        | Mean           | 862054,7887  | 27,9527   | 96,4147   |
|        | Median         | 784569,7674  | 29,0800   | 101,4119  |
|        | Std. Deviation | 227100,29157 | 2,49251   | 19,37709  |
|        | Minimum        | 592042,20    | 23,45     | 65,18     |
|        | Maximum        | 1219172,87   | 30,56     | 118,00    |
| HEKHe  | N              | 12           | 12        | 12        |
|        | Mean           | 763,6952     | 99,9853   | 99,9853   |

|        |                |             |           |           |
|--------|----------------|-------------|-----------|-----------|
|        | Median         | 703,6146    | 98,9738   | 98,9738   |
|        | Std. Deviation | 420,02811   | 18,82021  | 18,82021  |
|        | Minimum        | 271,88      | 57,51     | 57,51     |
|        | Maximum        | 1574,51     | 128,24    | 128,24    |
| HEKHI  | N              | 12          | 12        | 12        |
|        | Mean           | 3004,5692   | 100,1525  | 331,1995  |
|        | Median         | 2644,7232   | 98,4250   | 312,2218  |
|        | Std. Deviation | 2245,26811  | 18,75196  | 179,73019 |
|        | Minimum        | 182,54      | 66,32     | 62,06     |
|        | Maximum        | 6709,38     | 132,48    | 556,84    |
| HEKUe  | N              | 12          | 12        | 12        |
|        | Mean           | 3078,7329   | 497,5071  | 497,5071  |
|        | Median         | 2822,7435   | 376,4573  | 376,4573  |
|        | Std. Deviation | 856,12040   | 274,17135 | 274,17135 |
|        | Minimum        | 1927,39     | 270,94    | 270,94    |
|        | Maximum        | 4760,20     | 1120,26   | 1120,26   |
| HEKUI  | N              | 12          | 12        | 12        |
|        | Mean           | 4847,2184   | 486,2380  | 716,7112  |
|        | Median         | 4245,0400   | 138,3681  | 625,3852  |
|        | Std. Deviation | 2605,29064  | 673,38174 | 401,46589 |
|        | Minimum        | 1984,69     | 80,69     | 326,62    |
|        | Maximum        | 10126,58    | 2065,16   | 1702,12   |
| HELAHe | N              | 9           | 9         | 9         |
|        | Mean           | 59978,8837  | 99,9998   | 99,9998   |
|        | Median         | 33548,8127  | 101,2134  | 101,2134  |
|        | Std. Deviation | 48372,99192 | 19,02066  | 19,02066  |
|        | Minimum        | 17741,74    | 67,26     | 67,26     |
|        | Maximum        | 145377,78   | 127,18    | 127,18    |

|        |                |             |          |           |
|--------|----------------|-------------|----------|-----------|
| HELAHI | N              | 9           | 9        | 9         |
|        | Mean           | 54264,1857  | 100,0009 | 90,6030   |
|        | Median         | 33331,4917  | 100,0859 | 83,8070   |
|        | Std. Deviation | 42713,96577 | 14,24418 | 16,90098  |
|        | Minimum        | 20145,95    | 74,30    | 75,74     |
|        | Maximum        | 127119,66   | 121,73   | 124,08    |
| HELAUe | N              | 9           | 9        | 9         |
|        | Mean           | 28060,0776  | 47,4555  | 47,4555   |
|        | Median         | 15795,6731  | 48,9246  | 48,9246   |
|        | Std. Deviation | 22949,41638 | 9,69537  | 9,69537   |
|        | Minimum        | 10876,75    | 34,04    | 34,04     |
|        | Maximum        | 73817,39    | 61,09    | 61,09     |
| HELAUI | N              | 9           | 9        | 9         |
|        | Mean           | 19262,1154  | 35,2987  | 30,3175   |
|        | Median         | 12140,9922  | 37,9965  | 34,1043   |
|        | Std. Deviation | 17759,12812 | 19,95866 | 15,20718  |
|        | Minimum        | 3345,61     | 10,44    | 10,64     |
|        | Maximum        | 44812,50    | 59,95    | 48,03     |
| SKHe   | N              | 12          | 12       | 12        |
|        | Mean           | 549,3852    | 100,0608 | 100,0608  |
|        | Median         | 467,9900    | 106,7869 | 106,7869  |
|        | Std. Deviation | 426,65359   | 22,24295 | 22,24295  |
|        | Minimum        | 27,89       | 55,14    | 55,14     |
|        | Maximum        | 1307,48     | 123,70   | 123,70    |
| SKHI   | N              | 12          | 12       | 12        |
|        | Mean           | 1197,2878   | 100,0003 | 348,6782  |
|        | Median         | 739,3610    | 104,3274 | 304,4243  |
|        | Std. Deviation | 1043,88636  | 15,40607 | 250,85098 |

|      |                |            |           |           |
|------|----------------|------------|-----------|-----------|
|      | Minimum        | 194,91     | 73,49     | 43,74     |
|      | Maximum        | 2875,42    | 117,33    | 632,36    |
| SKUe | N              | 12         | 12        | 12        |
|      | Mean           | 2955,8925  | 873,0944  | 873,0944  |
|      | Median         | 2915,8293  | 745,2803  | 745,2803  |
|      | Std. Deviation | 1526,12410 | 579,12394 | 579,12394 |
|      | Minimum        | 715,07     | 285,58    | 285,58    |
|      | Maximum        | 4753,72    | 2101,13   | 2101,13   |
| SKUI | N              | 12         | 12        | 12        |
|      | Mean           | 1921,0003  | 172,1900  | 477,7410  |
|      | Median         | 1733,5906  | 154,2552  | 374,2921  |
|      | Std. Deviation | 1381,64219 | 69,66005  | 300,61632 |
|      | Minimum        | 205,47     | 77,47     | 122,49    |
|      | Maximum        | 4243,01    | 315,60    | 933,12    |
| SWHe | N              | 15         | 15        | 15        |
|      | Mean           | 233,6555   | 100,1009  | 100,1009  |
|      | Median         | 201,7333   | 97,4895   | 97,4895   |
|      | Std. Deviation | 180,05337  | 7,07023   | 7,07023   |
|      | Minimum        | 46,69      | 88,49     | 88,49     |
|      | Maximum        | 570,00     | 114,93    | 114,93    |
| SWHI | N              | 15         | 15        | 15        |
|      | Mean           | 520,0577   | 99,9812   | 234,5721  |
|      | Median         | 567,2811   | 97,3756   | 260,6069  |
|      | Std. Deviation | 354,54278  | 14,79878  | 142,80987 |
|      | Minimum        | 26,12      | 78,29     | 54,07     |
|      | Maximum        | 1056,12    | 130,77    | 505,63    |
| SWUe | N              | 15         | 15        | 15        |
|      | Mean           | 306,1903   | 133,2945  | 133,2945  |

|        |                |             |          |          |
|--------|----------------|-------------|----------|----------|
|        | Median         | 191,0065    | 125,9118 | 125,9118 |
|        | Std. Deviation | 235,72088   | 40,27364 | 40,27364 |
|        | Minimum        | 42,34       | 65,49    | 65,49    |
|        | Maximum        | 680,60      | 201,95   | 201,95   |
| SWUI   | N              | 15          | 15       | 15       |
|        | Mean           | 619,6890    | 164,1420 | 285,7477 |
|        | Median         | 774,4186    | 122,7968 | 288,7577 |
|        | Std. Deviation | 375,17461   | 98,21836 | 78,54655 |
|        | Minimum        | 88,92       | 76,30    | 153,32   |
|        | Maximum        | 1045,71     | 412,56   | 388,15   |
| U2OSHe | N              | 9           | 9        | 9        |
|        | Mean           | 158350,3096 | 99,9999  | 99,9999  |
|        | Median         | 179724,4898 | 101,7363 | 101,7363 |
|        | Std. Deviation | 64853,25435 | 12,83040 | 12,83040 |
|        | Minimum        | 67796,95    | 83,18    | 83,18    |
|        | Maximum        | 245196,58   | 117,61   | 117,61   |
| U2OSHI | N              | 9           | 9        | 9        |
|        | Mean           | 169879,1378 | 100,0001 | 131,7283 |
|        | Median         | 160762,8866 | 97,3641  | 86,1692  |
|        | Std. Deviation | 13369,24594 | 6,70875  | 73,24035 |
|        | Minimum        | 157404,41   | 88,15    | 76,35    |
|        | Maximum        | 192394,74   | 107,88   | 245,54   |
| U2OSUe | N              | 9           | 9        | 9        |
|        | Mean           | 42872,0784  | 25,2747  | 25,2747  |
|        | Median         | 49425,0000  | 26,2590  | 26,2590  |
|        | Std. Deviation | 22074,40424 | 5,80517  | 5,80517  |
|        | Minimum        | 11381,17    | 14,53    | 14,53    |
|        | Maximum        | 63174,83    | 30,91    | 30,91    |

|        |                |              |           |           |
|--------|----------------|--------------|-----------|-----------|
| U2OSUI | N              | 9            | 9         | 9         |
|        | Mean           | 288272,2078  | 168,2910  | 250,3346  |
|        | Median         | 269908,4967  | 164,0203  | 143,3998  |
|        | Std. Deviation | 93686,71738  | 48,61384  | 200,91130 |
|        | Minimum        | 173606,56    | 104,25    | 83,27     |
|        | Maximum        | 413372,73    | 231,51    | 527,56    |
| Total  | N              | 312          | 312       | 312       |
|        | Mean           | 247643,8384  | 197,2779  | 283,6549  |
|        | Median         | 1891,0346    | 106,8862  | 126,5459  |
|        | Std. Deviation | 734273,64045 | 282,84962 | 333,63965 |
|        | Minimum        | 1,70         | 10,44     | 10,64     |
|        | Maximum        | 4898584,91   | 2101,13   | 2101,13   |

Statistics on luciferase values in seven human cell lines

Statistics luciferase values in 7 cell lines

| Cells   | plasmid | X <sub>±</sub> SD           | H9-E vs H9-L  | UF1-E vs UF1-L | H9-E vs UF1-E | H9-E vs UF1-L | H9-L vs UF1-L | H9-L vs UF1-E |
|---------|---------|-----------------------------|---------------|----------------|---------------|---------------|---------------|---------------|
| BEL7402 | H9-E    | 11.321 <sub>±</sub> 8.398   | 0.0984        | 0.8481         | <b>0.0053</b> | <b>0.0006</b> | <b>0.0254</b> | 0.0527        |
|         | H9-L    | 22.675 <sub>±</sub> 21.189  |               |                |               |               |               |               |
|         | UF1-E   | 51.821 <sub>±</sub> 44.526  |               |                |               |               |               |               |
|         | UF1-L   | 48.780 <sub>±</sub> 31.179  |               |                |               |               |               |               |
| C33A    | H9-E    | 964772 <sub>±</sub> 459879  | <b>0.0001</b> | <b>0.0001</b>  | <b>0.0001</b> | 0.5564        | <b>0.0001</b> | 0.5578        |
|         | H9-L    | 3070632 <sub>±</sub> 817753 |               |                |               |               |               |               |
|         | UF1-E   | 2839185 <sub>±</sub> 822766 |               |                |               |               |               |               |
|         | UF1-L   | 862055 <sub>±</sub> 227100  |               |                |               |               |               |               |
| HEK293  | H9-E    | 764 <sub>±</sub> 420        | <b>0.0026</b> | <b>0.0360</b>  | <b>0.0001</b> | <b>0.0001</b> | 0.0769        | 0.9157        |
|         | H9-L    | 3004 <sub>±</sub> 2245      |               |                |               |               |               |               |
|         | UF1-E   | 3079 <sub>±</sub> 856       |               |                |               |               |               |               |
|         | UF1-L   | 4847 <sub>±</sub> 2605      |               |                |               |               |               |               |
| HeLa    | H9-E    | 59979 <sub>±</sub> 48373    | 0.7939        | 0.3766         | 0.0926        | <b>0.0307</b> | <b>0.0374</b> | 0.1245        |
|         | H9-L    | 54264 <sub>±</sub> 42714    |               |                |               |               |               |               |
|         | UF1-E   | 28060 <sub>±</sub> 22949    |               |                |               |               |               |               |
|         | UF1-L   | 19262 <sub>±</sub> 17759    |               |                |               |               |               |               |
| SK-N    | H9-E    | 549 <sub>±</sub> 426        | 0.0591        | 0.0956         | <b>0.0001</b> | <b>0.0034</b> | 0.1618        | <b>0.0033</b> |
|         | H9-L    | 1197 <sub>±</sub> 1044      |               |                |               |               |               |               |
|         | UF1-E   | 2956 <sub>±</sub> 1526      |               |                |               |               |               |               |
|         | UF1-L   | 1921 <sub>±</sub> 1382      |               |                |               |               |               |               |
| SW480   | H9-E    | 234 <sub>±</sub> 180        | <b>0.0094</b> | <b>0.0105</b>  | 0.3519        | <b>0.0012</b> | 0.4614        | 0.0617        |
|         | H9-L    | 520 <sub>±</sub> 355        |               |                |               |               |               |               |
|         | UF1-E   | 306 <sub>±</sub> 236        |               |                |               |               |               |               |

|      |       |              |        |               |               |               |               |               |
|------|-------|--------------|--------|---------------|---------------|---------------|---------------|---------------|
|      | UF1-L | 620+375      |        |               |               |               |               |               |
|      |       |              |        |               |               |               |               |               |
| U2OS | H9-E  | 158351+64853 | 0.6086 | <b>0.0001</b> | <b>0.0001</b> | <b>0.0035</b> | <b>0.0017</b> | <b>0.0001</b> |
|      | H9-L  | 169879+13369 |        |               |               |               |               |               |
|      | UF1-E | 42872+22074  |        |               |               |               |               |               |
|      | UF1-L | 288272+93687 |        |               |               |               |               |               |

Original data luciferase values transfections in seven human cell lines

| name  | cell | promoter | promoterregio | paralell | repeat | ratio      | RelativeRatio |
|-------|------|----------|---------------|----------|--------|------------|---------------|
| BELHe | BEL  | H9       | e             | 1        | 1      | 1.6961326  | 79.4069568    |
| BELHe | BEL  | H9       | e             | 2        | 1      | 2.58802817 | 121.162367    |
| BELHe | BEL  | H9       | e             | 3        | 1      | 2.11827957 | 99.1703918    |
| BELHe | BEL  | H9       | e             | 1        | 2      | 12.2707424 | 105.237928    |
| BELHe | BEL  | H9       | e             | 2        | 2      | 15.3051643 | 131.26213     |
| BELHe | BEL  | H9       | e             | 3        | 2      | 7.39776952 | 63.4457077    |
| BELHe | BEL  | H9       | e             | 1        | 4      | 8.5        | 104.808878    |
| BELHe | BEL  | H9       | e             | 2        | 4      | 7.10309278 | 87.5843746    |
| BELHe | BEL  | H9       | e             | 3        | 4      | 8.73509934 | 107.70776     |
| BELHe | BEL  | H9       | e             | 1        | 5      | 26.9341317 | 115.20159     |
| BELHe | BEL  | H9       | e             | 2        | 5      | 22.6708861 | 96.9670063    |
| BELHe | BEL  | H9       | e             | 3        | 5      | 20.5362319 | 87.8367489    |
| BELHI | BEL  | H9       | l             | 1        | 1      | 8.27748691 | 108.771181    |
| BELHI | BEL  | H9       | l             | 2        | 1      | 6.73267327 | 88.4713964    |
| BELHI | BEL  | H9       | l             | 3        | 1      | 7.82307692 | 102.79996     |
| BELHI | BEL  | H9       | l             | 1        | 2      | 62.0670391 | 112.746665    |
| BELHI | BEL  | H9       | l             | 2        | 2      | 47.32      | 85.9582198    |
| BELHI | BEL  | H9       | l             | 3        | 2      | 55.7740586 | 101.315274    |
| BELHI | BEL  | H9       | l             | 1        | 4      | 4.14102564 | 89.0543149    |
| BELHI | BEL  | H9       | l             | 2        | 4      | 5.35148515 | 115.085702    |
| BELHI | BEL  | H9       | l             | 3        | 4      | 4.47208122 | 96.1737896    |
| BELHI | BEL  | H9       | l             | 1        | 5      | 22.6862745 | 97.0328251    |
| BELHI | BEL  | H9       | l             | 2        | 5      | 27.2427184 | 116.521465    |
| BELHI | BEL  | H9       | l             | 3        | 5      | 20.2170543 | 86.4715751    |
| BELUe | BEL  | UF1      | e             | 1        | 1      | 17.7528736 | 831.127039    |
| BELUe | BEL  | UF1      | e             | 2        | 1      | 24.7346939 | 1157.99129    |
| BELUe | BEL  | UF1      | e             | 3        | 1      | 19.2653061 | 901.933807    |
| BELUe | BEL  | UF1      | e             | 1        | 2      | 153.979058 | 1320.57511    |
| BELUe | BEL  | UF1      | e             | 2        | 2      | 82.1452145 | 704.504413    |
| BELUe | BEL  | UF1      | e             | 3        | 2      | 124.353448 | 1066.49613    |
| BELUe | BEL  | UF1      | e             | 1        | 4      | 27.2797203 | 336.371397    |
| BELUe | BEL  | UF1      | e             | 2        | 4      | 28.6842105 | 353.689402    |
| BELUe | BEL  | UF1      | e             | 3        | 4      | 28.3034483 | 348.99443     |
| BELUe | BEL  | UF1      | e             | 1        | 5      | 36.3692308 | 155.557018    |
| BELUe | BEL  | UF1      | e             | 2        | 5      | 40.9007634 | 174.939108    |
| BELUe | BEL  | UF1      | e             | 3        | 5      | 38.0821918 | 162.883626    |
| BELUI | BEL  | UF1      | l             | 1        | 1      | 39.0239521 | 512.798319    |
| BELUI | BEL  | UF1      | l             | 2        | 1      | 36.8062827 | 483.656803    |
| BELUI | BEL  | UF1      | l             | 3        | 1      | 42.6746988 | 560.771338    |
| BELUI | BEL  | UF1      | l             | 1        | 2      | 100.728477 | 182.976343    |
| BELUI | BEL  | UF1      | l             | 2        | 2      | 105.191638 | 191.08381     |
| BELUI | BEL  | UF1      | l             | 3        | 2      | 89.2405063 | 162.108095    |
| BELUI | BEL  | UF1      | l             | 1        | 4      | 22.1445087 | 476.225993    |
| BELUI | BEL  | UF1      | l             | 2        | 4      | 19.5571429 | 420.583717    |
| BELUI | BEL  | UF1      | l             | 3        | 4      | 18.3195266 | 393.968315    |
| BELUI | BEL  | UF1      | l             | 1        | 5      | 35.8195489 | 153.20594     |

|        |      |     |   |   |   |            |            |
|--------|------|-----|---|---|---|------------|------------|
| BELUI  | BEL  | UF1 | l | 2 | 5 | 36.3763441 | 155.587443 |
| BELUI  | BEL  | UF1 | l | 3 | 5 | 39.4700855 | 168.819869 |
| C33AHe | C33A | H9  | e | 1 | 1 | 1608322.27 | 103.134208 |
| C33AHe | C33A | H9  | e | 2 | 1 | 1730706.47 | 110.982135 |
| C33AHe | C33A | H9  | e | 3 | 1 | 1339310.64 | 85.8837458 |
| C33AHe | C33A | H9  | e | 1 | 2 | 655355.556 | 95.7097895 |
| C33AHe | C33A | H9  | e | 2 | 2 | 633195.846 | 92.4735292 |
| C33AHe | C33A | H9  | e | 3 | 2 | 765643.939 | 111.816585 |
| C33AHe | C33A | H9  | e | 1 | 3 | 686076.459 | 105.527658 |
| C33AHe | C33A | H9  | e | 2 | 3 | 689457.589 | 106.04772  |
| C33AHe | C33A | H9  | e | 3 | 3 | 574882.353 | 88.4245297 |
| C33AHI | C33A | H9  | l | 1 | 1 | 3608080.81 | 90.4427109 |
| C33AHI | C33A | H9  | l | 2 | 1 | 3461400.36 | 86.7659148 |
| C33AHI | C33A | H9  | l | 3 | 1 | 4898584.91 | 122.791401 |
| C33AHI | C33A | H9  | l | 1 | 2 | 2741740.52 | 101.622426 |
| C33AHI | C33A | H9  | l | 2 | 2 | 2686327.08 | 99.56853   |
| C33AHI | C33A | H9  | l | 3 | 2 | 2665834.89 | 98.8089885 |
| C33AHI | C33A | H9  | l | 1 | 3 | 2114814.81 | 83.7691751 |
| C33AHI | C33A | H9  | l | 2 | 3 | 2711009.17 | 107.384817 |
| C33AHI | C33A | H9  | l | 3 | 3 | 2747899.16 | 108.846053 |
| C33AUe | C33A | UF1 | e | 1 | 1 | 3520153.06 | 225.731001 |
| C33AUe | C33A | UF1 | e | 2 | 1 | 3466267.33 | 222.27556  |
| C33AUe | C33A | UF1 | e | 3 | 1 | 2667816.96 | 171.074661 |
| C33AUe | C33A | UF1 | e | 1 | 2 | 1976828.9  | 288.701112 |
| C33AUe | C33A | UF1 | e | 2 | 2 | 1997093.19 | 291.660561 |
| C33AUe | C33A | UF1 | e | 3 | 2 | 1533044.44 | 223.889703 |
| C33AUe | C33A | UF1 | e | 1 | 3 | 3243407.71 | 498.879118 |
| C33AUe | C33A | UF1 | e | 2 | 3 | 3826086.96 | 588.502913 |
| C33AUe | C33A | UF1 | e | 3 | 3 | 3321969.7  | 510.962994 |
| C33AUI | C33A | UF1 | l | 1 | 1 | 1196969.23 | 30.0040791 |
| C33AUI | C33A | UF1 | l | 2 | 1 | 1016380.33 | 25.4773098 |
| C33AUI | C33A | UF1 | l | 3 | 1 | 1219172.87 | 30.5606512 |
| C33AUI | C33A | UF1 | l | 1 | 2 | 808005.571 | 29.9486714 |
| C33AUI | C33A | UF1 | l | 2 | 2 | 784569.767 | 29.0800249 |
| C33AUI | C33A | UF1 | l | 3 | 2 | 694400     | 25.7378887 |
| C33AUI | C33A | UF1 | l | 1 | 3 | 742593.83  | 29.4146193 |
| C33AUI | C33A | UF1 | l | 2 | 3 | 592042.202 | 23.4511724 |
| C33AUI | C33A | UF1 | l | 3 | 3 | 704359.296 | 27.9001248 |
| HEKHe  | HEK  | H9  | e | 1 | 1 | 271.883289 | 92.4270088 |
| HEKHe  | HEK  | H9  | e | 2 | 1 | 320.637584 | 109.001082 |
| HEKHe  | HEK  | H9  | e | 3 | 1 | 289.96328  | 98.5733207 |
| HEKHe  | HEK  | H9  | e | 1 | 3 | 517.987805 | 85.2458372 |
| HEKHe  | HEK  | H9  | e | 2 | 3 | 603.838384 | 99.3743637 |
| HEKHe  | HEK  | H9  | e | 3 | 3 | 701.075269 | 115.376748 |
| HEKHe  | HEK  | H9  | e | 1 | 4 | 1400.57307 | 114.072689 |
| HEKHe  | HEK  | H9  | e | 2 | 4 | 1574.5098  | 128.239341 |
| HEKHe  | HEK  | H9  | e | 3 | 4 | 706.153846 | 57.5142204 |

|        |      |     |   |   |   |            |            |
|--------|------|-----|---|---|---|------------|------------|
| HEKHe  | HEK  | H9  | e | 1 | 5 | 1094.88    | 118.249074 |
| HEKHe  | HEK  | H9  | e | 2 | 5 | 848.52     | 91.6417362 |
| HEKHe  | HEK  | H9  | e | 3 | 5 | 834.32     | 90.1081099 |
| HEKHI  | HEK  | H9  | l | 1 | 1 | 228.431877 | 94.2181384 |
| HEKHI  | HEK  | H9  | l | 2 | 1 | 316.389549 | 130.496824 |
| HEKHI  | HEK  | H9  | l | 3 | 1 | 182.544987 | 75.2918074 |
| HEKHI  | HEK  | H9  | l | 1 | 3 | 1930.43478 | 103.150169 |
| HEKHI  | HEK  | H9  | l | 2 | 3 | 1820.07366 | 97.2531721 |
| HEKHI  | HEK  | H9  | l | 3 | 3 | 1863.93443 | 99.5968125 |
| HEKHI  | HEK  | H9  | l | 1 | 4 | 5217.48401 | 103.020306 |
| HEKHI  | HEK  | H9  | l | 2 | 4 | 3359.01163 | 66.3243827 |
| HEKHI  | HEK  | H9  | l | 3 | 4 | 6709.375   | 132.478004 |
| HEKHI  | HEK  | H9  | l | 1 | 5 | 5155.88    | 107.212027 |
| HEKHI  | HEK  | H9  | l | 2 | 5 | 4608.16    | 95.8226677 |
| HEKHI  | HEK  | H9  | l | 3 | 5 | 4663.11    | 96.965305  |
| HEKUe  | HEK  | UF1 | e | 1 | 1 | 1927.38589 | 655.216852 |
| HEKUe  | HEK  | UF1 | e | 2 | 1 | 3295.3668  | 1120.26339 |
| HEKUe  | HEK  | UF1 | e | 3 | 1 | 2678.62267 | 910.600581 |
| HEKUe  | HEK  | UF1 | e | 1 | 3 | 2686.74699 | 442.160981 |
| HEKUe  | HEK  | UF1 | e | 2 | 3 | 3591.24088 | 591.014561 |
| HEKUe  | HEK  | UF1 | e | 3 | 3 | 2219.15888 | 365.209479 |
| HEKUe  | HEK  | UF1 | e | 1 | 4 | 4425.65598 | 360.45708  |
| HEKUe  | HEK  | UF1 | e | 2 | 4 | 3369.98255 | 274.475484 |
| HEKUe  | HEK  | UF1 | e | 3 | 4 | 4760.20408 | 387.70507  |
| HEKUe  | HEK  | UF1 | e | 1 | 5 | 2958.74    | 319.549416 |
| HEKUe  | HEK  | UF1 | e | 2 | 5 | 2508.67    | 270.94102  |
| HEKUe  | HEK  | UF1 | e | 3 | 5 | 2523.02    | 272.490847 |
| HEKUI  | HEK  | UF1 | l | 1 | 1 | 3066.09808 | 1264.63109 |
| HEKUI  | HEK  | UF1 | l | 2 | 1 | 3252.74725 | 1341.6157  |
| HEKUI  | HEK  | UF1 | l | 3 | 1 | 5006.96864 | 2065.15514 |
| HEKUI  | HEK  | UF1 | l | 1 | 3 | 1984.689   | 106.049169 |
| HEKUI  | HEK  | UF1 | l | 2 | 3 | 2430.45113 | 129.867865 |
| HEKUI  | HEK  | UF1 | l | 3 | 3 | 2216.32653 | 118.426407 |
| HEKUI  | HEK  | UF1 | l | 1 | 4 | 8182.82548 | 161.57159  |
| HEKUI  | HEK  | UF1 | l | 2 | 4 | 10126.5823 | 199.951472 |
| HEKUI  | HEK  | UF1 | l | 3 | 4 | 7438.17204 | 146.868253 |
| HEKUI  | HEK  | UF1 | l | 1 | 5 | 5971.68    | 124.175877 |
| HEKUI  | HEK  | UF1 | l | 2 | 5 | 3880.62    | 80.694108  |
| HEKUI  | HEK  | UF1 | l | 3 | 5 | 4609.46    | 95.8497    |
| HELAHe | HELA | H9  | e | 1 | 1 | 35290.3226 | 112.203747 |
| HELAHe | HELA | H9  | e | 2 | 1 | 31156.5934 | 99.0607701 |
| HELAHe | HELA | H9  | e | 3 | 1 | 27907.9755 | 88.7319581 |
| HELAHe | HELA | H9  | e | 1 | 2 | 33548.8127 | 127.180002 |
| HELAHe | HELA | H9  | e | 2 | 2 | 27847.0255 | 105.565129 |
| HELAHe | HELA | H9  | e | 3 | 2 | 17741.7417 | 67.2570671 |
| HELAHe | HELA | H9  | e | 1 | 3 | 123587.591 | 101.213365 |
| HELAHe | HELA | H9  | e | 2 | 3 | 145377.778 | 119.058669 |

|        |      |     |   |   |   |            |            |
|--------|------|-----|---|---|---|------------|------------|
| HELAHe | HELA | H9  | e | 3 | 3 | 97352.1127 | 79.7275422 |
| HELAHI | HELA | H9  | l | 1 | 1 | 39025.0696 | 121.728905 |
| HELAHI | HELA | H9  | l | 2 | 1 | 23820.6522 | 74.3025427 |
| HELAHI | HELA | H9  | l | 3 | 1 | 33331.4917 | 103.969218 |
| HELAHI | HELA | H9  | l | 1 | 2 | 22107.438  | 104.601079 |
| HELAHI | HELA | H9  | l | 2 | 2 | 20145.9459 | 95.3203026 |
| HELAHI | HELA | H9  | l | 3 | 2 | 21153.1532 | 100.085891 |
| HELAHI | HELA | H9  | l | 1 | 3 | 95442.8571 | 87.084488  |
| HELAHI | HELA | H9  | l | 2 | 3 | 127119.658 | 115.987206 |
| HELAHI | HELA | H9  | l | 3 | 3 | 106231.405 | 96.9282331 |
| HELAUe | HELA | UF1 | e | 1 | 1 | 15795.6731 | 50.2215219 |
| HELAUe | HELA | UF1 | e | 2 | 1 | 15387.7551 | 48.9245679 |
| HELAUe | HELA | UF1 | e | 3 | 1 | 11132.2751 | 35.3944904 |
| HELAUe | HELA | UF1 | e | 1 | 2 | 16114.9425 | 61.0900433 |
| HELAUe | HELA | UF1 | e | 2 | 2 | 13518.2927 | 51.2464183 |
| HELAUe | HELA | UF1 | e | 3 | 2 | 10876.7507 | 41.2326119 |
| HELAUe | HELA | UF1 | e | 1 | 3 | 73817.3913 | 60.4535332 |
| HELAUe | HELA | UF1 | e | 2 | 3 | 54335.5263 | 44.4986539 |
| HELAUe | HELA | UF1 | e | 3 | 3 | 41562.0915 | 34.0377144 |
| HELAUI | HELA | UF1 | l | 1 | 1 | 3751.91816 | 11.7031665 |
| HELAUI | HELA | UF1 | l | 2 | 1 | 3404.68227 | 10.6200514 |
| HELAUI | HELA | UF1 | l | 3 | 1 | 3345.60907 | 10.4357873 |
| HELAUI | HELA | UF1 | l | 1 | 2 | 12669.5157 | 59.945662  |
| HELAUI | HELA | UF1 | l | 2 | 2 | 10887.931  | 51.5161156 |
| HELAUI | HELA | UF1 | l | 3 | 2 | 12140.9922 | 57.4449594 |
| HELAUI | HELA | UF1 | l | 1 | 3 | 40702.4793 | 37.1379764 |
| HELAUI | HELA | UF1 | l | 2 | 3 | 41643.4109 | 37.9965062 |
| HELAUI | HELA | UF1 | l | 3 | 3 | 44812.5    | 40.8880637 |
| SKHe   | SK   | H9  | e | 1 | 2 | 27.887931  | 55.1362812 |
| SKHe   | SK   | H9  | e | 2 | 2 | 61.2669683 | 121.128842 |
| SKHe   | SK   | H9  | e | 3 | 2 | 62.5675676 | 123.700213 |
| SKHe   | SK   | H9  | e | 1 | 3 | 1304.49102 | 115.356952 |
| SKHe   | SK   | H9  | e | 2 | 3 | 780.511182 | 69.0210891 |
| SKHe   | SK   | H9  | e | 3 | 3 | 1307.47664 | 115.620972 |
| SKHe   | SK   | H9  | e | 1 | 4 | 422.916667 | 75.4844391 |
| SKHe   | SK   | H9  | e | 2 | 4 | 607.894737 | 108.500319 |
| SKHe   | SK   | H9  | e | 3 | 4 | 650        | 116.015493 |
| SKHe   | SK   | H9  | e | 1 | 5 | 431.63     | 94.9242374 |
| SKHe   | SK   | H9  | e | 2 | 5 | 458.2      | 100.767522 |
| SKHe   | SK   | H9  | e | 3 | 5 | 477.78     | 105.073563 |
| SKHI   | SK   | H9  | l | 1 | 2 | 194.90982  | 73.4926359 |
| SKHI   | SK   | H9  | l | 2 | 2 | 309.494163 | 116.697773 |
| SKHI   | SK   | H9  | l | 3 | 2 | 291.229236 | 109.810805 |
| SKHI   | SK   | H9  | l | 1 | 3 | 677.744807 | 110.962001 |
| SKHI   | SK   | H9  | l | 2 | 3 | 660.05291  | 108.065441 |
| SKHI   | SK   | H9  | l | 3 | 3 | 494.578313 | 80.9735446 |
| SKHI   | SK   | H9  | l | 1 | 4 | 800.977199 | 75.0519756 |

|      |    |     |   |   |   |            |            |
|------|----|-----|---|---|---|------------|------------|
| SKHI | SK | H9  | l | 2 | 4 | 1252.1978  | 117.331578 |
| SKHI | SK | H9  | l | 3 | 4 | 1148.52941 | 107.617797 |
| SKHI | SK | H9  | l | 1 | 5 | 2875.42    | 101.036927 |
| SKHI | SK | H9  | l | 2 | 5 | 2793.75    | 98.1671943 |
| SKHI | SK | H9  | l | 3 | 5 | 2868.57    | 100.79623  |
| SKUe | SK | UF1 | e | 1 | 2 | 1062.75168 | 2101.13024 |
| SKUe | SK | UF1 | e | 2 | 2 | 715.065913 | 1413.73253 |
| SKUe | SK | UF1 | e | 3 | 2 | 757.08061  | 1496.79836 |
| SKUe | SK | UF1 | e | 1 | 3 | 3479.86577 | 307.726694 |
| SKUe | SK | UF1 | e | 2 | 3 | 3229.42643 | 285.580187 |
| SKUe | SK | UF1 | e | 3 | 3 | 4388.57143 | 388.0841   |
| SKUe | SK | UF1 | e | 1 | 4 | 2602.23214 | 464.460375 |
| SKUe | SK | UF1 | e | 2 | 4 | 2587.6652  | 461.860388 |
| SKUe | SK | UF1 | e | 3 | 4 | 2497.56098 | 445.778103 |
| SKUe | SK | UF1 | e | 1 | 5 | 4730.99    | 1040.44116 |
| SKUe | SK | UF1 | e | 2 | 5 | 4753.72    | 1045.43995 |
| SKUe | SK | UF1 | e | 3 | 5 | 4665.78    | 1026.10015 |
| SKUI | SK | UF1 | l | 1 | 2 | 262.598425 | 99.0152804 |
| SKUI | SK | UF1 | l | 2 | 2 | 409.803922 | 154.520539 |
| SKUI | SK | UF1 | l | 3 | 2 | 205.46875  | 77.4739829 |
| SKUI | SK | UF1 | l | 1 | 3 | 1927.67123 | 315.602946 |
| SKUI | SK | UF1 | l | 2 | 3 | 1385.14851 | 226.779829 |
| SKUI | SK | UF1 | l | 3 | 3 | 1692.56198 | 277.110297 |
| SKUI | SK | UF1 | l | 1 | 4 | 1774.61929 | 166.28274  |
| SKUI | SK | UF1 | l | 2 | 4 | 1643.42629 | 153.989889 |
| SKUI | SK | UF1 | l | 3 | 4 | 1918.13472 | 179.73021  |
| SKUI | SK | UF1 | l | 1 | 5 | 4243.01    | 149.091503 |
| SKUI | SK | UF1 | l | 2 | 5 | 3503.62    | 123.11071  |
| SKUI | SK | UF1 | l | 3 | 5 | 4085.94    | 143.572355 |
| SWHe | SW | H9  | e | 1 | 1 | 201.733333 | 96.5832017 |
| SWHe | SW | H9  | e | 2 | 1 | 240.063291 | 114.934309 |
| SWHe | SW | H9  | e | 3 | 1 | 184.819277 | 88.4853148 |
| SWHe | SW | H9  | e | 1 | 2 | 87.3700306 | 92.3768562 |
| SWHe | SW | H9  | e | 2 | 2 | 104.537572 | 110.528201 |
| SWHe | SW | H9  | e | 3 | 2 | 91.8154762 | 97.0770524 |
| SWHe | SW | H9  | e | 1 | 3 | 49.6978852 | 102.894172 |
| SWHe | SW | H9  | e | 2 | 3 | 46.6927083 | 96.672274  |
| SWHe | SW | H9  | e | 3 | 3 | 48.5100287 | 100.434842 |
| SWHe | SW | H9  | e | 1 | 4 | 523.193717 | 96.7909345 |
| SWHe | SW | H9  | e | 2 | 4 | 526.969697 | 97.4894914 |
| SWHe | SW | H9  | e | 3 | 4 | 570        | 105.450105 |
| SWHe | SW | H9  | e | 1 | 5 | 292.86     | 106.560419 |
| SWHe | SW | H9  | e | 2 | 5 | 279.76     | 101.793836 |
| SWHe | SW | H9  | e | 3 | 5 | 256.81     | 93.4432194 |
| SWHI | SW | H9  | l | 1 | 1 | 1056.11511 | 114.477818 |
| SWHI | SW | H9  | l | 2 | 1 | 875.531915 | 94.9034648 |
| SWHI | SW | H9  | l | 3 | 1 | 836        | 90.6183947 |

|        |      |     |   |   |   |            |            |
|--------|------|-----|---|---|---|------------|------------|
| SWHI   | SW   | H9  | l | 1 | 2 | 246.481994 | 101.663021 |
| SWHI   | SW   | H9  | l | 2 | 2 | 286.646707 | 118.229205 |
| SWHI   | SW   | H9  | l | 3 | 2 | 193.610451 | 79.8558265 |
| SWHI   | SW   | H9  | l | 1 | 3 | 43.6239782 | 130.767321 |
| SWHI   | SW   | H9  | l | 2 | 3 | 30.3286385 | 90.9131849 |
| SWHI   | SW   | H9  | l | 3 | 3 | 26.118068  | 78.2915707 |
| SWHI   | SW   | H9  | l | 1 | 4 | 503.921569 | 86.4997457 |
| SWHI   | SW   | H9  | l | 2 | 4 | 567.281106 | 97.3756125 |
| SWHI   | SW   | H9  | l | 3 | 4 | 676.506024 | 116.124418 |
| SWHI   | SW   | H9  | l | 1 | 5 | 780.43     | 95.224325  |
| SWHI   | SW   | H9  | l | 2 | 5 | 863.59     | 105.371109 |
| SWHI   | SW   | H9  | l | 3 | 5 | 814.68     | 99.4033457 |
| SWUe   | SW   | UF1 | e | 1 | 1 | 201.698113 | 96.5663394 |
| SWUe   | SW   | UF1 | e | 2 | 1 | 189.558824 | 90.7544518 |
| SWUe   | SW   | UF1 | e | 3 | 1 | 136.789668 | 65.4903375 |
| SWUe   | SW   | UF1 | e | 1 | 2 | 191.006494 | 201.952309 |
| SWUe   | SW   | UF1 | e | 2 | 2 | 160.027322 | 169.197846 |
| SWUe   | SW   | UF1 | e | 3 | 2 | 168.516484 | 178.173486 |
| SWUe   | SW   | UF1 | e | 1 | 3 | 61.7473684 | 127.841342 |
| SWUe   | SW   | UF1 | e | 2 | 3 | 42.3364486 | 87.6531027 |
| SWUe   | SW   | UF1 | e | 3 | 3 | 53.216     | 110.178054 |
| SWUe   | SW   | UF1 | e | 1 | 4 | 671.484375 | 124.224734 |
| SWUe   | SW   | UF1 | e | 2 | 4 | 680.603448 | 125.911764 |
| SWUe   | SW   | UF1 | e | 3 | 4 | 667        | 123.395123 |
| SWUe   | SW   | UF1 | e | 1 | 5 | 520        | 189.207874 |
| SWUe   | SW   | UF1 | e | 2 | 5 | 435.47     | 158.450679 |
| SWUe   | SW   | UF1 | e | 3 | 5 | 413.4      | 150.42026  |
| SWUI   | SW   | UF1 | l | 1 | 1 | 774.418605 | 83.9432665 |
| SWUI   | SW   | UF1 | l | 2 | 1 | 703.921569 | 76.3017255 |
| SWUI   | SW   | UF1 | l | 3 | 1 | 810.731707 | 87.8794328 |
| SWUI   | SW   | UF1 | l | 1 | 2 | 273.10705  | 112.644689 |
| SWUI   | SW   | UF1 | l | 2 | 2 | 269.59799  | 111.197356 |
| SWUI   | SW   | UF1 | l | 3 | 2 | 297.720798 | 122.796782 |
| SWUI   | SW   | UF1 | l | 1 | 3 | 137.630522 | 412.561517 |
| SWUI   | SW   | UF1 | l | 2 | 3 | 111.20462  | 333.347184 |
| SWUI   | SW   | UF1 | l | 3 | 3 | 88.9151874 | 266.532336 |
| SWUI   | SW   | UF1 | l | 1 | 4 | 1027.09677 | 176.30444  |
| SWUI   | SW   | UF1 | l | 2 | 4 | 1041.34078 | 178.749469 |
| SWUI   | SW   | UF1 | l | 3 | 4 | 828.75     | 142.257583 |
| SWUI   | SW   | UF1 | l | 1 | 5 | 999.77     | 121.98714  |
| SWUI   | SW   | UF1 | l | 2 | 5 | 885.42     | 108.034701 |
| SWUI   | SW   | UF1 | l | 3 | 5 | 1045.71    | 127.592518 |
| U2OSHe | U2OS | H9  | e | 1 | 1 | 216618.557 | 115.087348 |
| U2OSHe | U2OS | H9  | e | 2 | 1 | 156555.556 | 83.1764551 |
| U2OSHe | U2OS | H9  | e | 3 | 1 | 191489.13  | 101.736326 |
| U2OSHe | U2OS | H9  | e | 1 | 2 | 245196.581 | 117.614381 |
| U2OSHe | U2OS | H9  | e | 2 | 2 | 200504.505 | 96.176762  |

|        |      |     |   |   |   |            |            |
|--------|------|-----|---|---|---|------------|------------|
| U2OSHe | U2OS | H9  | e | 3 | 2 | 179724.49  | 86.2091329 |
| U2OSHe | U2OS | H9  | e | 1 | 3 | 85841.1765 | 109.554178 |
| U2OSHe | U2OS | H9  | e | 2 | 3 | 81425.8373 | 103.919134 |
| U2OSHe | U2OS | H9  | e | 3 | 3 | 67796.9543 | 86.5253708 |
| U2OSHI | U2OS | H9  | l | 1 | 1 | 160220.43  | 97.3641088 |
| U2OSHI | U2OS | H9  | l | 2 | 1 | 159465.241 | 96.9051888 |
| U2OSHI | U2OS | H9  | l | 3 | 1 | 173989.529 | 105.731431 |
| U2OSHI | U2OS | H9  | l | 1 | 2 | 179641.304 | 107.877125 |
| U2OSHI | U2OS | H9  | l | 2 | 2 | 160762.887 | 96.5403705 |
| U2OSHI | U2OS | H9  | l | 3 | 2 | 159168.317 | 95.582809  |
| U2OSHI | U2OS | H9  | l | 1 | 3 | 185865.385 | 104.094192 |
| U2OSHI | U2OS | H9  | l | 2 | 3 | 157404.412 | 88.1545808 |
| U2OSHI | U2OS | H9  | l | 3 | 3 | 192394.737 | 107.750966 |
| U2OSUe | U2OS | UF1 | e | 1 | 1 | 58181.8182 | 30.9114382 |
| U2OSUe | U2OS | UF1 | e | 2 | 1 | 48105.2632 | 25.5578619 |
| U2OSUe | U2OS | UF1 | e | 3 | 1 | 49425      | 26.2590253 |
| U2OSUe | U2OS | UF1 | e | 1 | 2 | 63174.8252 | 30.3033098 |
| U2OSUe | U2OS | UF1 | e | 2 | 2 | 63078.7402 | 30.2572204 |
| U2OSUe | U2OS | UF1 | e | 3 | 2 | 60756.3025 | 29.1432078 |
| U2OSUe | U2OS | UF1 | e | 1 | 3 | 17207.5472 | 21.9610072 |
| U2OSUe | U2OS | UF1 | e | 2 | 3 | 11381.1659 | 14.5251304 |
| U2OSUe | U2OS | UF1 | e | 3 | 3 | 14538.0435 | 18.5540725 |
| U2OSUI | U2OS | UF1 | l | 1 | 1 | 278218.391 | 169.07011  |
| U2OSUI | U2OS | UF1 | l | 2 | 1 | 252579.235 | 153.48949  |
| U2OSUI | U2OS | UF1 | l | 3 | 1 | 269908.497 | 164.020283 |
| U2OSUI | U2OS | UF1 | l | 1 | 2 | 203801.724 | 122.385797 |
| U2OSUI | U2OS | UF1 | l | 2 | 2 | 202137.931 | 121.386666 |
| U2OSUI | U2OS | UF1 | l | 3 | 2 | 173606.557 | 104.253175 |
| U2OSUI | U2OS | UF1 | l | 1 | 3 | 401345.133 | 224.773954 |
| U2OSUI | U2OS | UF1 | l | 2 | 3 | 413372.727 | 231.510026 |
| U2OSUI | U2OS | UF1 | l | 3 | 3 | 399479.675 | 223.729201 |

Effect of HPyV9 LTA<sub>g</sub> on HPyV9 and UF-1 promoters in BEL7402, HEK293 and HeLa cells

**EFFECT OF HPyV9 LTA<sub>g</sub> ON THE H9 AND UF1 EARLY AND LATE PROMOTERS IN BEL7401, HEK293 AND HeLa CELLS**

Effect HPyV9 LTA<sub>g</sub> on **H9-E** and **UF1-E** promoters in **BEL7401** cells

| plasmid          | LUC                  | Average LUC±SD | protein                 | LUC/prot                | Average±SD        |
|------------------|----------------------|----------------|-------------------------|-------------------------|-------------------|
| H9-E+EV          | 799<br>761<br>817    | 792±29         | 0,291<br>0,252<br>0,333 | 2746<br>3020<br>2453    | 2740±284          |
| H9-E+LT          | 2612<br>2503<br>2567 | 2561±55        | 0,267<br>0,248<br>0,251 | 9783<br>10093<br>10227  | 10034±228         |
| p (EV versus LT) |                      | p=0.0001       |                         |                         | p=0.0001 (3.7x)   |
| UF1-E+EV         | 6959<br>7350<br>6375 | 6895±491       | 0,217<br>0,215<br>0,237 | 32069<br>34186<br>26899 | 31051±3749        |
| UF1-E+LT         | 8068<br>8463<br>7297 | 7943±593       | 0,237<br>0,339<br>0,272 | 34042<br>24965<br>26827 | 28611±4794 (0.9x) |
| p (EV versus LT) |                      | p=0.0778       |                         |                         | p=0.5256          |

| plasmid          | LUC                   | protein                 | LUC/prot                | Average±SD        |
|------------------|-----------------------|-------------------------|-------------------------|-------------------|
| H9-E+EV          | 1662<br>1640<br>1795  | 0,186<br>0,176<br>0,195 | 8935<br>9318<br>9205    | 9153±197          |
| H9-E+LT          | 6221<br>7261<br>5334  | 0,222<br>0,244<br>0,216 | 28023<br>29758<br>24694 | 27492±2573 (3.0x) |
| p (EV versus LT) |                       |                         |                         | p=0.0003          |
| UF1-E+EV         | 9302<br>10143<br>9013 | 0,194<br>0,219<br>0,208 | 47948<br>46315<br>43332 | 45865±2341        |
| UF1-E+LT         | 8738<br>8320<br>6895  | 0,224<br>0,205<br>0,185 | 39009<br>40585<br>37270 | 38965±1658 (0.8x) |
| p (EV versus LT) |                       |                         |                         | p=0.0140          |

| plasmid                | LUC   | prot  | LUC/prot | Average±SD      |
|------------------------|-------|-------|----------|-----------------|
| H9-E+EV                | 3696  | 0,219 | 16877    | 17028±741       |
|                        | 3504  | 0,214 | 16374    |                 |
|                        | 3317  | 0,186 | 17833    |                 |
| H9-E+LTA <sub>g</sub>  | 7670  | 0,230 | 33348    | 36073±2365      |
|                        | 8426  | 0,226 | 37283    |                 |
|                        | 9209  | 0,245 | 37588    |                 |
| LTA <sub>g</sub>       |       |       |          | P=0.0002 (2.1x) |
|                        |       |       |          |                 |
| UF1-E+EV               | 8567  | 0,275 | 31153    | 31828±2685      |
|                        | 6943  | 0,235 | 29545    |                 |
|                        | 8488  | 0,244 | 34787    |                 |
| UF1-E+LTA <sub>g</sub> | 13117 | 0,237 | 55346    | 57167±1980      |
|                        | 12457 | 0,219 | 56881    |                 |
|                        | 12981 | 0,219 | 59274    |                 |
| LTA <sub>g</sub>       |       |       |          | P=0.0002 (1.8x) |

| plasmid                | LUC   | protein | LUC/prot | Average±SD        |
|------------------------|-------|---------|----------|-------------------|
| H9-E+pcDNA3.1          | 2383  | 0,197   | 12096    | 11359±1296        |
|                        | 2160  | 0,219   | 9863     |                   |
|                        | 2339  | 0,193   | 12119    |                   |
| H9-E+LTA <sub>g</sub>  | 5246  | 0,263   | 19947    | 23935±3562 (2.1x) |
|                        | 5896  | 0,220   | 26800    |                   |
|                        | 5964  | 0,238   | 25059    |                   |
| EV vs LTA <sub>g</sub> |       |         |          | p=0.0045          |
|                        |       |         |          |                   |
| UF1-E+pcDNA3.1         | 6100  | 0,235   | 25957    | 29271±3012        |
|                        | 6933  | 0,231   | 30013    |                   |
|                        | 8884  | 0,279   | 31842    |                   |
| UF1-E+LTA <sub>g</sub> | 11572 | 0,191   | 60586    | 68154±6823 (2.3x) |
|                        | 12888 | 0,184   | 70043    |                   |
|                        | 12921 | 0,175   | 73834    |                   |
| EV vs LTA <sub>g</sub> |       |         |          | p=0.0008          |

| plasmid                 | LUC   | protein | LUC/protein | Average±SD        |
|-------------------------|-------|---------|-------------|-------------------|
| UF1-E+EV                | 6605  | 0,198   | 33359       | 30429±2852        |
|                         | 5892  | 0,213   | 27662       |                   |
|                         | 6689  | 0,221   | 30267       |                   |
| UF1-E+LTA <sub>g</sub>  | 12239 | 0,180   | 67994       | 61971±5225 (2.0x) |
|                         | 12319 | 0,210   | 58662       |                   |
|                         | 10133 | 0,171   | 59257       |                   |
| EV vs. LTA <sub>g</sub> |       |         |             | p=0.0008          |

Effect HPyV9 LTA<sub>g</sub> on **H9-L** and **UF1-L** promoters in **BEL7401** cells

| plasmid                      | LUC   | Protein conc | LUC/prot | Average±SD        |
|------------------------------|-------|--------------|----------|-------------------|
| H9-L+pcDNA3.1                | 8917  | 0,198        | 45035    | 41890±7885        |
|                              | 7637  | 0,232        | 32918    |                   |
|                              | 10164 | 0,213        | 47718    |                   |
| H9-L+LTA <sub>g</sub>        | 14912 | 0,249        | 59888    | 54149±5118        |
|                              | 11914 | 0,238        | 50059    |                   |
|                              | 12285 | 0,234        | 52500    |                   |
| pcDNA3.1 vs LTA <sub>g</sub> |       |              |          | 0.0868 (1.3x)     |
|                              |       |              |          |                   |
| UF1-L+pcDNA3.1               | 4154  | 0,258        | 16101    | 16757±1049        |
|                              | 3755  | 0,209        | 17967    |                   |
|                              | 3808  | 0,235        | 16204    |                   |
| UF1-L+LTA <sub>g</sub>       | 19776 | 0,227        | 87119    | 81069±6103 (4.8x) |
|                              | 20699 | 0,255        | 81173    |                   |
|                              | 16706 | 0,223        | 74915    |                   |
| pcDNA3.1 vs LTA <sub>g</sub> |       |              |          | 0.0001            |

| plasmid          | LUC   | protein | LUC/prot | Average+SD          |
|------------------|-------|---------|----------|---------------------|
| H9-L+pcDNA3.1    | 13875 | 0,193   | 71891    | 72621±5322          |
|                  | 14715 | 0,188   | 78271    |                     |
|                  | 12931 | 0,191   | 67702    |                     |
| H9-L+LTag        | 23074 | 0,242   | 95347    | 98318±2851          |
|                  | 25864 | 0,256   | 101031   |                     |
|                  | 23067 | 0,234   | 98577    |                     |
| pcDNA3.1 vs LTag |       |         |          | 0.0018 (1.4x)       |
| UF1-L+pcDNA3.1   | 6209  | 0,228   | 27232    | 24843±4401          |
|                  | 6112  | 0,222   | 27532    |                     |
|                  | 5356  | 0,271   | 19764    |                     |
| UF1-L+LTag       | 46358 | 0,273   | 169810   | 153146±14870 (6.2x) |
|                  | 37143 | 0,263   | 141228   |                     |
|                  | 35616 | 0,240   | 148400   |                     |
| pcDNA3.1 vs LTag |       |         |          | 0.0001              |

| plasmid    | LUC                     | protein                 | LUC/prot                   | Average±SD         |
|------------|-------------------------|-------------------------|----------------------------|--------------------|
| H9-L+EV    | 8284<br>8397<br>9557    | 0,126<br>0,115<br>0,140 | 65746<br>73017<br>68264    | 69009±3692         |
| H9-L+LTag  | 14969<br>14864<br>14866 | 0,175<br>0,157<br>0,152 | 85537<br>94675<br>97803    | 92672±6374 (1.3x)  |
| EV vs LTag |                         |                         |                            | p=0.0051           |
| UF-1+EV    | 3253<br>3952<br>2932    | 0,141<br>0,146<br>0,128 | 23071<br>27068<br>22906    | 24348±2357         |
| UF1-L+LTag | 15757<br>16353<br>13807 | 0,155<br>0,139<br>0,130 | 101658<br>117647<br>106208 | 108504±8238 (4.5x) |
| EV vs LTag |                         |                         |                            | p=0.0001           |

Effect HPyV9 LTA<sub>g</sub> on **H9-E** and **UF1-E** promoters in **HEK293** cells

| plasmid                | LUC     | Protein conc | LUC/prot | Average±SD       |
|------------------------|---------|--------------|----------|------------------|
| H9-E+EV                | 3685000 | 0,243        | 15164609 | 15930607±1753680 |
|                        | 4269000 | 0,238        | 17936975 |                  |
|                        | 4363000 | 0,297        | 14690236 |                  |
| H9-E+LTA <sub>g</sub>  | 6110000 | 0,313        | 19520767 | 18563802±2387613 |
|                        | 6890000 | 0,339        | 20324484 |                  |
|                        | 7210000 | 0,455        | 15846154 |                  |
| LTA <sub>g</sub>       |         |              |          | P=0.1985 (1.2x)  |
|                        |         |              |          |                  |
| UF1-E+EV               | 15840   | 1,011        | 15668    | 15236±1239       |
|                        | 11846   | 0,856        | 13839    |                  |
|                        | 10693   | 0,660        | 16202    |                  |
| UF1-E-LTA <sub>g</sub> | 52761   | 0,907        | 58171    | 72303±25413      |
|                        | 39640   | 0,390        | 101641   |                  |
|                        | 45277   | 0,793        | 57096    |                  |
| LTA <sub>g</sub>       |         |              |          | P=0.0178 (4.7x)  |

| plasmid                | LUC    | prot  | LUC/prot | Average±SD      |
|------------------------|--------|-------|----------|-----------------|
| H9-E+EV                | 40622  | 0,638 | 63671    | 87918±21841     |
|                        | 57923  | 0,616 | 94031    |                 |
|                        | 72115  | 0,680 | 106051   |                 |
| H9-E+LTA <sub>g</sub>  | 136159 | 0,531 | 256420   | 272991±21469    |
|                        | 148043 | 0,558 | 265310   |                 |
|                        | 173293 | 0,583 | 297244   |                 |
| LTA <sub>g</sub>       |        |       |          | P=0.0005 (3.1x) |
|                        |        |       |          |                 |
| UF1-E+EV               | 3768   | 0,737 | 5113     | 5700±1757       |
|                        | 3302   | 0,766 | 4311     |                 |
|                        | 6040   | 0,787 | 7675     |                 |
| UF1-E-LTA <sub>g</sub> | 45766  | 0,880 | 52007    | 40674±10731     |
|                        | 34547  | 0,878 | 39347    |                 |
|                        | 23706  | 0,773 | 30668    |                 |
| LTA <sub>g</sub>       |        |       |          | P=0.0051 (7.1x) |

| plasmid                | LUC     | prot  | LUC/prot | Average±SD      |
|------------------------|---------|-------|----------|-----------------|
| H9-E+EV                | 2799000 | 0,445 | 6289888  | 6779145+899549  |
|                        | 3166000 | 0,405 | 7817284  |                 |
|                        | 2841000 | 0,456 | 6230263  |                 |
| H9-E+LTA <sub>g</sub>  | 4278000 | 0,444 | 9635135  | 9896748+650001  |
|                        | 3805000 | 0,404 | 9418317  |                 |
|                        | 4510000 | 0,424 | 10636792 |                 |
| LTA <sub>g</sub>       |         |       |          | P=0.0082 (1.5x) |
| UF1-E+EV               | 8172    | 0,509 | 16055    | 17203+2246      |
|                        | 9203    | 0,465 | 19791    |                 |
|                        | 7629    | 0,484 | 15762    |                 |
| UF1-E+LTA <sub>g</sub> | 15993   | 0,440 | 36348    | 39582+3589      |
|                        | 21852   | 0,503 | 43443    |                 |
|                        | 18581   | 0,477 | 38954    |                 |
| LTA <sub>g</sub>       |         |       |          | P=0.0008 (2.3x) |

| plasmid                | LUC     | prot  | LUC/prot | Average±SD      |
|------------------------|---------|-------|----------|-----------------|
| H9-E+EV                | 2704000 | 0,284 | 9521127  | 8849607+628660  |
|                        | 2557000 | 0,309 | 8275081  |                 |
|                        | 2512000 | 0,287 | 8752613  |                 |
| H9-E+LTA <sub>g</sub>  | 5160000 | 0,326 | 15828221 | 15496269+333072 |
|                        | 5519000 | 0,364 | 15162088 |                 |
|                        | 5161000 | 0,333 | 15498499 |                 |
| LTA <sub>g</sub>       |         |       |          | P=0.0001 (1.8x) |
| UF1-E+EV               | 75256   | 0,378 | 199090   | 236064+35109    |
|                        | 99781   | 0,371 | 268951   |                 |
|                        | 92939   | 0,387 | 240152   |                 |
| UF1-E+LTA <sub>g</sub> | 328587  | 0,333 | 986748   | 929506+87386    |
|                        | 302556  | 0,365 | 828921   |                 |
|                        | 336606  | 0,346 | 972850   |                 |
| LTA <sub>g</sub>       |         |       |          | P=0.0002 (3.9x) |

Effect HPyV9 LTA<sub>g</sub> on **H9-L** and **UF1-L** promoters in **HEK293** cells

| plasmid                | LUC     | Prot. Conc. | LUC/port | Average±SD      |
|------------------------|---------|-------------|----------|-----------------|
| H9-L+EV                | 57474   | 0,972       | 10354595 | 9353901±1316846 |
|                        | 80457   | 0,893       | 9845039  |                 |
|                        | 135893  | 1,467       | 7862069  |                 |
| H9-L+LTA <sub>g</sub>  | 1565000 | 0,917       | 5439349  | 5043589±369754  |
|                        | 2114000 | 1,012       | 4706970  |                 |
|                        | 2233000 | 1,079       | 4984448  |                 |
| LTA <sub>g</sub>       |         |             |          | P=0.0055 (0.1x) |
|                        |         |             |          |                 |
| UF1-L+EV               | 1318000 | 2,017       | 653446   | 700480±51042    |
|                        | 716263  | 0,949       | 754756   |                 |
|                        | 811090  | 1,170       | 693239   |                 |
| UF1-L+LTA <sub>g</sub> | 282865  | 0,380       | 744382   | 680883±177858   |
|                        | 826461  | 1,010       | 818278   |                 |
|                        | 602388  | 1,255       | 479990   |                 |
| LTA <sub>g</sub>       |         |             |          | P=0.8634 (1.0x) |

| plasmid                | LUC      | Prot. Conc. | LUC/port | Average±SD       |
|------------------------|----------|-------------|----------|------------------|
| H9-L+EV                | 42771000 | 0,725       | 58994483 | 55485532±3386046 |
|                        | 40811000 | 0,739       | 55224628 |                  |
|                        | 44872000 | 0,859       | 52237485 |                  |
| H9-L+LTA <sub>g</sub>  | 24416000 | 0,960       | 25433333 | 28393784±2624391 |
|                        | 24652000 | 0,810       | 30434568 |                  |
|                        | 23099000 | 0,788       | 29313452 |                  |
| LTA <sub>g</sub>       |          |             |          | P=0.0004 (0.5x)  |
|                        |          |             |          |                  |
| UF1-L+EV               | 331057   | 0,749       | 441999   | 490558±53382     |
|                        | 453039   | 0,940       | 481956   |                  |
|                        | 479801   | 0,876       | 547718   |                  |
| UF1-L+LTA <sub>g</sub> | 957553   | 0,833       | 1149523  | 919159±200168    |
|                        | 615229   | 0,750       | 820305   |                  |
|                        | 559230   | 0,710       | 787648   |                  |
| LTA <sub>g</sub>       |          |             |          | P=0.0231 (1.9x)  |

| plasmid    | LUC      | prot  | LUC/prot | Average±SD       |
|------------|----------|-------|----------|------------------|
| H9-L+EV    | 8096000  | 0,341 | 23741935 | 23101164±633020  |
|            | 7552000  | 0,336 | 22476190 |                  |
|            | 7572000  | 0,328 | 23085366 |                  |
| H9-L+LTAg  | 5657000  | 0,263 | 21509506 | 19499907±2470950 |
|            | 6095000  | 0,301 | 20249169 |                  |
|            | 6077000  | 0,363 | 16741047 |                  |
| LTAg       |          |       |          | P=0.0708 (0.8x)  |
|            |          |       |          |                  |
| UF1-L+EV   | 29573000 | 0,820 | 36064634 | 33566830±2471330 |
|            | 23560000 | 0,757 | 31122853 |                  |
|            | 28352000 | 0,846 | 33513002 |                  |
| UF1-L+LTAg | 22872000 | 0,775 | 29512258 | 26425622±2725533 |
|            | 21653000 | 0,852 | 25414319 |                  |
|            | 21063000 | 0,865 | 24350289 |                  |
| LTAg       |          |       |          | P=0.0283 (0.8x)  |

| plasmid    | LUC     | protein | LUC/prot | Average±SD       |
|------------|---------|---------|----------|------------------|
| H9-L+EV    | 3710786 | 0,247   | 15023425 | 15409685±496912  |
|            | 3108013 | 0,204   | 15235358 |                  |
|            | 3241965 | 0,203   | 15970271 |                  |
| H9-L+LTAg  | 2290525 | 0,297   | 7712205  | 8380007±690414   |
|            | 2034182 | 0,244   | 8336811  |                  |
|            | 2172750 | 0,239   | 9091004  |                  |
| LTAg       |         |         |          | P=0.0001 (0.5x)  |
|            |         |         |          |                  |
| UF1-L+EV   | 1619123 | 0,247   | 6555154  | 6566337±1116000  |
|            | 1314889 | 0,241   | 5455971  |                  |
|            | 1560641 | 0,203   | 7687887  |                  |
| UF1-L+LTAg | 4427185 | 0,288   | 15372170 | 16197588±1962261 |
|            | 4523559 | 0,306   | 14782873 |                  |
|            | 5512879 | 0,299   | 18437722 |                  |
| LTAg       |         |         |          | P=0.0018 (2.5x)  |

Effect HPyV9 LTA<sub>g</sub> on **H9-E** and **UF1-E** promoters in **HeLa** cells

| plasmid                | LUC    | Prot conc | LUC/prot | Average±SD      |
|------------------------|--------|-----------|----------|-----------------|
| H9-E+EV                | 23519  | 0,283     | 83106    | 79738±12062     |
|                        | 23289  | 0,351     | 66350    |                 |
|                        | 26209  | 0,292     | 89757    |                 |
| H9-E+LTA <sub>g</sub>  | 182138 | 0,391     | 465826   | 459752±33569    |
|                        | 169001 | 0,399     | 423561   |                 |
|                        | 165576 | 0,338     | 489870   |                 |
| LTA <sub>g</sub>       |        |           |          | P=0.0001 (5.8x) |
|                        |        |           |          |                 |
| UF1-E+EV               | 40718  | 0,390     | 104405   | 108402±12553    |
|                        | 41497  | 0,422     | 98334    |                 |
|                        | 57559  | 0,470     | 122466   |                 |
| UF1-E+LTA <sub>g</sub> | 73832  | 0,390     | 185508   | 189335±21939    |
|                        | 66129  | 0,531     | 169562   |                 |
|                        | 113069 | 0,523     | 212936   |                 |
| LTA <sub>g</sub>       |        |           |          | P=0.0052 (1.8x) |

| plasmid                | LUC   | Prot conc | LUC/prot | Average±SD      |
|------------------------|-------|-----------|----------|-----------------|
| H9-E+EV                | 14288 | 0,250     | 57152    | 63163±5367      |
|                        | 12888 | 0,191     | 67476    |                 |
|                        | 12064 | 0,186     | 64860    |                 |
| H9-E+LTA <sub>g</sub>  | 47580 | 0,173     | 275029   | 272355±17776    |
|                        | 56000 | 0,221     | 253394   |                 |
|                        | 53976 | 0,187     | 288642   |                 |
| LTA <sub>g</sub>       |       |           |          | P=0.0001 (4.3x) |
|                        |       |           |          |                 |
| UF1-E+EV               | 20553 | 0,488     | 42117    | 39214±4425      |
|                        | 22008 | 0,645     | 34121    |                 |
|                        | 22896 | 0,553     | 41403    |                 |
| UF1-E+LTA <sub>g</sub> | 21307 | 0,523     | 40740    | 41966±5163      |
|                        | 22625 | 0,475     | 47632    |                 |
|                        | 19026 | 0,507     | 37527    |                 |
| LTA <sub>g</sub>       |       |           |          | P=0.5218 (1.1x) |

| plasmid                | LUC    | prot  | LUC/prot | Average±SD      |
|------------------------|--------|-------|----------|-----------------|
| H9-E+EV                | 23610  | 0,238 | 99202    | 96272±5903      |
|                        | 23332  | 0,233 | 100137   |                 |
|                        | 20222  | 0,226 | 89478    |                 |
| H9-E+LTA <sub>g</sub>  | 212182 | 0,247 | 859036   | 844088±78955    |
|                        | 215822 | 0,236 | 914500   |                 |
|                        | 185888 | 0,245 | 758727   |                 |
| LTA <sub>g</sub>       |        |       |          | P=0.0001 (8.8x) |
|                        |        |       |          |                 |
| UF1-E+EV               | 22771  | 0,244 | 93324    | 95488±7050      |
|                        | 25635  | 0,248 | 103367   |                 |
|                        | 24598  | 0,274 | 89774    |                 |
| UF1-E+LTA <sub>g</sub> | 39880  | 0,275 | 145018   | 150212±18277    |
|                        | 40393  | 0,299 | 135094   |                 |
|                        | 41437  | 0,243 | 170523   |                 |
| LTA <sub>g</sub>       |        |       |          | P=0.0084 (1.6x) |

| plasmid                | LUC   | prot  | LUC/prot | Average±SD      |
|------------------------|-------|-------|----------|-----------------|
| H9-E+EV                | 9318  | 0,137 | 68015    | 68301±3573      |
|                        | 8785  | 0,122 | 72008    |                 |
|                        | 8629  | 0,133 | 64880    |                 |
| H9-E+LTA <sub>g</sub>  | 61630 | 0,162 | 380432   | 330797±43636    |
|                        | 47755 | 0,160 | 298469   |                 |
|                        | 46710 | 0,149 | 313490   |                 |
| LTA <sub>g</sub>       |       |       |          | P=0.0005 (4.8x) |
|                        |       |       |          |                 |
| UF1-E+EV               | 44784 | 0,250 | 179136   | 161113±17953    |
|                        | 45394 | 0,282 | 160972   |                 |
|                        | 42253 | 0,295 | 143231   |                 |
| UF1-E+LTA <sub>g</sub> | 50968 | 0,246 | 207187   | 228217±18642    |
|                        | 68687 | 0,283 | 242710   |                 |
|                        | 57045 | 0,243 | 234753   |                 |
| LTA <sub>g</sub>       |       |       |          | P=0.0109 (1.4x) |

| plasmid                | LUC                        | Prot                    | LUC/prot                   | Average±SD      |
|------------------------|----------------------------|-------------------------|----------------------------|-----------------|
| H9-E+EV                | 12279<br>13077<br>9742     | 0,190<br>0,173<br>0,148 | 64626<br>75590<br>65824    | 68680±6014      |
| H9-E+LTA <sub>g</sub>  | 147342<br>104549<br>100081 | 0,183<br>0,241<br>0,161 | 805148<br>433813<br>621621 | 620194±185672   |
| LTA <sub>g</sub>       |                            |                         |                            | P=0.0068 (9.0x) |
| UF1-E                  | 4206<br>4655<br>4129       | 0,198<br>0,214<br>0,221 | 21242<br>21752<br>18683    | 20559±1645      |
| UF1-E+LTA <sub>g</sub> | 38814<br>45311<br>41244    | 0,197<br>0,190<br>0,157 | 197025<br>238479<br>262701 | 232735±33213    |
| LTA <sub>g</sub>       |                            |                         |                            | P=0.7160 (1.0x) |

Effect HPyV9 LTA<sub>g</sub> on **H9-L** and **UF1-L** promoters in **HeLa** cells

| plasmid                | LUC    | Prot conc | LUC/prot | Average±SD       |
|------------------------|--------|-----------|----------|------------------|
| H9-L+EV                | 49243  | 0,388     | 126915   | 144364±20255     |
|                        | 61564  | 0,441     | 139601   |                  |
|                        | 73793  | 0,443     | 166576   |                  |
| H9-L+LTA <sub>g</sub>  | 113079 | 0,257     | 439996   | 413311±68559     |
|                        | 159329 | 0,343     | 464516   |                  |
|                        | 148592 | 0,443     | 335422   |                  |
| LTA <sub>g</sub>       |        |           |          | P=0.0029 (2.9x)  |
| UF1-L+EV               | 30553  | 0,433     | 70561    | 70657±8373       |
|                        | 33971  | 0,545     | 62332    |                  |
|                        | 33450  | 0,423     | 79078    |                  |
| UF1-L+LTA <sub>g</sub> | 525728 | 0,341     | 1541724  | 1615167±68425    |
|                        | 709223 | 0,436     | 1626658  |                  |
|                        | 597054 | 0,356     | 1677118  |                  |
| LTA <sub>g</sub>       |        |           |          | P=0.0001 (22.9x) |

| plasmid                | LUC    | Prot conc | LUC/prot | Average±SD       |
|------------------------|--------|-----------|----------|------------------|
| H9-L+EV                | 4722   | 0,440     | 10732    | 9943±979         |
|                        | 4100   | 0,400     | 10250    |                  |
|                        | 4450   | 0,503     | 8847     |                  |
| H9-L+LTA <sub>g</sub>  | 117883 | 0,625     | 188613   | 258458±72035     |
|                        | 165269 | 0,650     | 254260   |                  |
|                        | 119700 | 0,360     | 332500   |                  |
| LTA <sub>g</sub>       |        |           |          | P=0.0039 (2.9x)  |
| UF1-L+EV               | 13929  | 0,151     | 92245    | 62251±26956      |
|                        | 7896   | 0,145     | 54455    |                  |
|                        | 7770   | 0,194     | 40052    |                  |
| UF1-L+LTA <sub>g</sub> | 575011 | 0,179     | 3212352  | 3169334±943410   |
|                        | 621756 | 0,152     | 4090500  |                  |
|                        | 729905 | 0,331     | 2205151  |                  |
| LTA <sub>g</sub>       |        |           |          | P=0.0047 (50.9x) |

| plasmid                | LUC                        | prot                    | LUC/prot                     | Average±SD      |
|------------------------|----------------------------|-------------------------|------------------------------|-----------------|
| H9-L+EV                | 11128<br>7175<br>9897      | 0,103<br>0,084<br>0,088 | 108039<br>85417<br>112466    | 101974±14509    |
| H9-L+LTA <sub>g</sub>  | 26093<br>15124<br>17259    | 0,121<br>0,113<br>0,097 | 215645<br>133841<br>177928   | 175805±40943    |
| LTA <sub>g</sub>       |                            |                         |                              | P=0.0422 (1.7x) |
| UF1-L+EV               | 8674<br>6907<br>7831       | 0,181<br>0,220<br>0,155 | 47923<br>31395<br>50523      | 43280±10375     |
| UF1-L+LTA <sub>g</sub> | 166997<br>288318<br>212557 | 0,169<br>0,177<br>0,158 | 988148<br>1628915<br>1345297 | 1320787±321086  |
| LTA <sub>g</sub>       |                            |                         |                              | P=0.0023 (31x)  |

| plasmid                | LUC                        | protein                 | LUC/prot                      | Average±SD      |
|------------------------|----------------------------|-------------------------|-------------------------------|-----------------|
| H9-L+EV                | 5293<br>4226<br>4048       | 0,088<br>0,082<br>0,079 | 60148<br>51537<br>51241       | 54309±5059      |
| H9-L+LTA <sub>g</sub>  | 15106<br>10482<br>14818    | 0,145<br>0,090<br>0,099 | 104179<br>116467<br>149677    | 123441±23537    |
| LTA <sub>g</sub>       |                            |                         |                               | P=0.0076 (2.3x) |
| UF1-L+EV               | 3682<br>3936<br>3765       | 0,094<br>0,085<br>0,083 | 39170<br>46306<br>45361       | 43612±3876      |
| UF1-L+LTA <sub>g</sub> | 172326<br>170863<br>217762 | 0,116<br>0,108<br>0,112 | 1485569<br>1582065<br>1944304 | 1670646±241856  |
| LTA <sub>g</sub>       |                            |                         |                               | P=0.0003 (38x)  |

Effect of mutation of the Sp1 sites

Transfection 06.09.2017: UF1-E and mutUF1-E in HeLa

| plasmid                 | LUC   | prot  | LUC/prot | Average±SD      |
|-------------------------|-------|-------|----------|-----------------|
| UF1-E+EV                | 16250 | 0,223 | 72870    | 69602±5423      |
|                         | 12795 | 0,202 | 63342    |                 |
|                         | 16261 | 0,224 | 72594    |                 |
| UF1-E+LTA <sub>g</sub>  | 39201 | 0,200 | 196005   | 203070±8016     |
|                         | 34944 | 0,165 | 211782   |                 |
|                         | 39076 | 0,194 | 201423   |                 |
| UF1-E vs mutUF1-E       |       |       |          | P=0.0007        |
| EV vs LTA <sub>g</sub>  |       |       |          | P=0.0001 (2.9x) |
|                         |       |       |          |                 |
| mUF1-E+EV               | 24350 | 0,211 | 115403   | 117386±7073     |
|                         | 24422 | 0,219 | 111516   |                 |
|                         | 23670 | 0,189 | 125238   |                 |
| mUF1-E+LTA <sub>g</sub> | 57555 | 0,215 | 267698   | 263163±38611    |
|                         | 44942 | 0,202 | 222485   |                 |
|                         | 53875 | 0,180 | 299306   |                 |
| EV vs LTA <sub>g</sub>  |       |       |          | P=0.0030 (2.2x) |

Transfection 06.09.2017: UF1-L and mutUF1-L in HeLa

| plasmid                   | LUC    | protein | LUC/prot | Average±SD      |
|---------------------------|--------|---------|----------|-----------------|
| UF1-L+EV                  | 9146   | 0,154   | 59390    | 54452±4348      |
|                           | 10495  | 0,205   | 51195    |                 |
|                           | 8338   | 0,158   | 52772    |                 |
| UF1-L+LTA <sub>g</sub>    | 482715 | 0,178   | 2711882  | 2372769±398393  |
|                           | 395586 | 0,160   | 2472413  |                 |
|                           | 330716 | 0,171   | 1934012  |                 |
| UF1-L vs mutUF1-L         |        |         |          | P=0.0641 (ns)   |
| LTA <sub>g</sub>          |        |         |          | P=0.0005 (44x)  |
|                           |        |         |          |                 |
| mutUF1-L+EV               | 17254  | 0,138   | 125029   | 94166±26742     |
|                           | 11293  | 0,145   | 77883    |                 |
|                           | 10346  | 0,130   | 79585    |                 |
| mutUF1-L+LTA <sub>g</sub> | 90909  | 0,158   | 575373   | 573791±101653   |
|                           | 107943 | 0,160   | 674644   |                 |
|                           | 63633  | 0,135   | 471356   |                 |
| LTA <sub>g</sub>          |        |         |          | P=0.0014 (6.1x) |

Transfection HeLa 08.09.2017

Early

| plasmid                   | LUC   | protein | LUC/prot | Average±SD      |
|---------------------------|-------|---------|----------|-----------------|
| UF1-E+EV                  | 20366 | 0,117   | 174068   | 158675±16266    |
|                           | 21480 | 0,134   | 160299   |                 |
|                           | 18982 | 0,134   | 141657   |                 |
| UF1-E+LTA <sub>g</sub>    | 23635 | 0,126   | 187579   | 207056±17443    |
|                           | 20598 | 0,097   | 212351   |                 |
|                           | 23230 | 0,105   | 221238   |                 |
| UF1-E vs mutUF1-E         |       |         |          | P=0.7806        |
| EV vs LTA <sub>g</sub>    |       |         |          | P=0.0246 (1.3x) |
|                           |       |         |          |                 |
| mutUF1-E+EV               | 15203 | 0,088   | 172761   | 154467±18271    |
|                           | 15442 | 0,100   | 154420   |                 |
|                           | 13077 | 0,096   | 136219   |                 |
| mutUF1-E+LTA <sub>g</sub> | 23791 | 0,082   | 290134   | 271161±28038    |
|                           | 27015 | 0,094   | 287394   |                 |
|                           | 21745 | 0,091   | 238956   |                 |
| UF1-E vs mutUF1-E         |       |         |          | P=0.7806        |
| EV vs LTA <sub>g</sub>    |       |         |          | P=0.0038 (1.8x) |

Late

| plasmid                   | LUC    | protein | LUC/prot | Average±SD      |
|---------------------------|--------|---------|----------|-----------------|
| UF1-L+EV                  | 7894   | 0,117   | 67470    | 62790±5507      |
|                           | 6523   | 0,115   | 56722    |                 |
|                           | 7509   | 0,117   | 64179    |                 |
| UF1-L+LTA <sub>g</sub>    | 155364 | 0,118   | 1316644  | 1642526±359965  |
|                           | 284047 | 0,140   | 2028907  |                 |
|                           | 223066 | 0,141   | 1582028  |                 |
| UF1-L vs mutUF1-L         |        |         |          | P=0.0020        |
| EV vs LTA <sub>g</sub>    |        |         |          | P=0.0016 (26x)  |
|                           |        |         |          |                 |
| mutUF1-L+EV               | 19324  | 0,117   | 165162   | 144758±18948    |
|                           | 14815  | 0,116   | 127716   |                 |
|                           | 14988  | 0,106   | 141396   |                 |
| mutUF1-L+LTA <sub>g</sub> | 31129  | 0,089   | 349764   | 412543±98517    |
|                           | 55505  | 0,107   | 518738   |                 |
|                           | 30792  | 0,095   | 324126   |                 |
| EV vs LTA <sub>g</sub>    |        |         |          | P=0.0099 (2.8x) |

Transfection HeLa 13.09.2017

Early

| plasmid                   | LUC                     | protein                 | LUC/prot                   | Average±SD        |
|---------------------------|-------------------------|-------------------------|----------------------------|-------------------|
| UF1-E+EV                  | 22693<br>16286<br>21990 | 0,107<br>0,102<br>0,133 | 212084<br>159667<br>165338 | 179030±28766      |
| UF1-E+LTA <sub>g</sub>    | 15729<br>21012<br>24778 | 0,088<br>0,110<br>0,149 | 178739<br>191018<br>166295 | 178684±12362      |
| UF1-E vs mutUF1-E         |                         |                         |                            | P=0.0513          |
| EV vs LTA <sub>g</sub>    |                         |                         |                            | P=0.9857 (0.998x) |
|                           |                         |                         |                            |                   |
| mutUF1-E+EV               | 13195<br>10991<br>11531 | 0,093<br>0,101<br>0,090 | 141882<br>108822<br>128122 | 126275±16607      |
| mutUF1-E+LTA <sub>g</sub> | 34252<br>19590<br>24957 | 0,129<br>0,099<br>0,097 | 265519<br>197879<br>257289 | 240229±36906      |
| EV vs LTA <sub>g</sub>    |                         |                         |                            | P=0.0082 (1.9x)   |

Late

| plasmid                   | LUC                        | protein                 | LUC/prot                      | Average±SD      |
|---------------------------|----------------------------|-------------------------|-------------------------------|-----------------|
| UF1-L+EV                  | 7732<br>6295<br>6503       | 0,109<br>0,111<br>0,090 | 70936<br>56712<br>72256       | 66635±8619      |
| UF1-L+LTA <sub>g</sub>    | 209056<br>202895<br>212890 | 0,129<br>0,099<br>0,097 | 1620589<br>2049444<br>2194742 | 1954925±298519  |
| UF1-L vs mutUF1-L         |                            |                         |                               | P=0.0650        |
| EV vs LTA <sub>g</sub>    |                            |                         |                               | P=0.0004 (29x)  |
|                           |                            |                         |                               |                 |
| mutUF1-L+EV               | 15531<br>9281<br>12672     | 0,100<br>0,105<br>0,115 | 155310<br>88390<br>110191     | 117964±34131    |
| mutUF1-L+LTA <sub>g</sub> | 56053<br>81420<br>51723    | 0,098<br>0,116<br>0,089 | 571969<br>701897<br>581157    | 618341±72507    |
| EV vs LTA <sub>g</sub>    |                            |                         |                               | P=0.0004 (5.2x) |

Transfection 15092017; HeLa cells; early promoter

| plasmid                   | LUC  | protein | LUC/prot | Average±SD      |
|---------------------------|------|---------|----------|-----------------|
| UF1-E+EV                  | 9750 | 0,089   | 109551   | 81600±24897     |
|                           | 8590 | 0,139   | 61799    |                 |
|                           | 8300 | 0,113   | 73451    |                 |
| UF1-E+LTA <sub>g</sub>    | 6754 | 0,087   | 77632    | 82050±4269      |
|                           | 6754 | 0,082   | 82366    |                 |
|                           | 6203 | 0,072   | 86153    |                 |
| mutUF1-E+EV               | 5192 | 0,064   | 81125    | 85731±9092      |
|                           | 5271 | 0,066   | 79864    |                 |
|                           | 5195 | 0,054   | 96204    |                 |
| mutUF1-E+LTA <sub>g</sub> | 2481 | 0,055   | 45109    | 43609±1621      |
|                           | 2542 | 0,058   | 43828    |                 |
|                           | 3016 | 0,072   | 41889    |                 |
| UF1-E vs mutUF1-E         |      |         |          | P=0.8006        |
| LTA <sub>g</sub> UF1-E    |      |         |          | P=0.9769 (1.0x) |
| LTA <sub>g</sub> mutUF1-E |      |         |          | P=0.0014 (0.5x) |

Late promoter

| plasmid                   | LUC   | protein | LUC/prot | Average±SD      |
|---------------------------|-------|---------|----------|-----------------|
| UF1-L+EV                  | 1945  | 0,065   | 29923    | 30428±900       |
|                           | 1888  | 0,060   | 31467    |                 |
|                           | 1704  | 0,057   | 29895    |                 |
| UF1-L+LTA <sub>g</sub>    | 46663 | 0,081   | 576086   | 606604±163901   |
|                           | 34508 | 0,075   | 460107   |                 |
|                           | 55637 | 0,071   | 783620   |                 |
| mutUF1-L+EV               | 5322  | 0,073   | 72904    | 59953±12624     |
|                           | 3734  | 0,063   | 59270    |                 |
|                           | 3624  | 0,076   | 47684    |                 |
| mutUF1-L+LTA <sub>g</sub> | 9875  | 0,063   | 156746   | 167408±14693    |
|                           | 9356  | 0,058   | 161310   |                 |
|                           | 13076 | 0,071   | 184169   |                 |
| UF1-L vs mutUF1-L         |       |         |          | P=0.0156        |
| LTA <sub>g</sub> UF1-L    |       |         |          | P=0.0037 (20x)  |
| LTA <sub>g</sub> mutUF1-L |       |         |          | P=0.0007 (2.8x) |
